# Supplementary material for: Supramolecular photocatalysts fixed on the inside of the polypyrrole layer in dye sensitized molecular photocathodes: application to photocatalytic CO2 reduction coupled with water oxidation
Source: Royal Society of Chemistry journal article supplement (doi:10.1039/d1sc03756k), 2021-01-01
Supplement: d1sc03756k1.pdf [file d1sc03756k1.pdf]

## Supramolecular photocatalysts fixed on the inside of polypyrrole layer in dye-sensitized molecular photocathodes: application to photocatalytic CO<sub>2</sub> reduction coupled with water oxidation

Fazalurahman Kuttassery,<sup>1,†</sup> Hiromu Kumagai,<sup>2</sup> Ryutaru Kamata,<sup>1</sup> Yusuke Ebato,<sup>1</sup> Masanobu Higashi,<sup>3</sup> Hajime Suzuki,<sup>4</sup> Ryu Abe,<sup>4</sup> and Osamu Ishitani\*,<sup>1</sup>

<sup>1</sup> Department of Chemistry, Tokyo Institute of Technology, 2-12-1-NE-1, O-okayama, Meguro-ku, Tokyo 152-8550, Japan.

<sup>2</sup> Institute of Multidisciplinary Research for Advanced Materials, Tohoku University, 2-1-1, Katahira, Aoba-ku, Sendai, Miyagi 980-8577, Japan.

<sup>3</sup> The OCU Advanced Research Institute for Natural Science and Technology Osaka City University, 3-3-138 Sugimoto, Sumiyoshi-ku, Osaka City, Osaka, 558-8585, Japan.

<sup>4</sup> Department of Energy and Hydrocarbon Chemistry, Graduate School of Engineering, Kyoto University, Katsura, Nishikyo-ku, Kyoto 615-8510, Japan.

<sup>†</sup> Present address: Department of Chemistry, University of Calicut, Malappuram, Kerala 673635, India.

### Supplementary information

#### SI - I Synthetic strategy and <sup>1</sup>H-NMR Spectra of ligands and Ru(II) Complexes

- (a) 4,4'-bis((1H-pyrrol-1-yl)methyl)-2,2'-bipyridine (Pyrdmb)
- (b) [Ru(dmb)<sub>2</sub>]Cl<sub>2</sub>
- (c) [Ru(Pyrdmb)<sub>2</sub>]Cl<sub>2</sub>
- (d) [Ru(dmb)(Pyrdmb)]Cl<sub>2</sub>
- (e) [Ru(dmb)<sub>2</sub>(Pyrdmb)](PF<sub>6</sub>)<sub>2</sub> (PyrRu)
- (f) [Ru(Pyrdmb)<sub>2</sub>(dmb)](PF<sub>6</sub>)<sub>2</sub> (Pyr2Ru)
- (g) [Ru(dmb)(Pydmb)(dmb-PO<sub>3</sub>H<sub>2</sub>)](PF<sub>6</sub>)<sub>2</sub> (PRuPyr)
- (h) [Ru(dmb)(Pydmb)(bpyC<sub>2</sub>bpy)](PF<sub>6</sub>)<sub>2</sub> (PyrRuC<sub>2</sub>bpy)
- (i) [Ru(dmb)(Pydmb)(bpyC<sub>2</sub>bpy)Ru(CO)<sub>2</sub>Cl<sub>2</sub>](PF<sub>6</sub>)<sub>2</sub> (PyrRuC<sub>2</sub>RuCAT)

#### SI - II Figures, Schemes and Tables

Fig. S1 Cyclic voltammogram of PyrRu and Pyr2Ru

Fig. S2 Oxidative electropolymerization of Pyr2Ru on NiO electrode

Fig. S3 Images of photocathode after each fabrication step.

Fig. S4 TOF – SIMS spectra of NiO/PRu-*PolyPyr*-RuC<sub>2</sub>RuCAT1 for ionic species Et<sub>4</sub>N<sup>+</sup> and BF<sub>4</sub><sup>-</sup>

Fig. S5 Cyclic voltammograms of *Pyr*RuC<sub>2</sub>RuCAT and *Pyr*RuC<sub>2</sub>bpy recorded in MeCN solution.

Fig. S6 Time courses of photocurrent and product amounts generated during photoelectrochemical CO<sub>2</sub> reduction using NiO/PRu-*PolyPyr*-RuC<sub>2</sub>RuCAT1 under a weak light intensity (8 mW cm<sup>-2</sup>).

Fig. S7 UV-vis (DR) spectra of NiO/PRu-*PolyPyr*-RuC<sub>2</sub>RuCAT1 electrode prepared using different numbers of oxidation cycles between 0 and +1.35 V vs. Ag/AgNO<sub>3</sub>.

Fig. S8 Time courses of the electrons and oxygen evolved upon the irradiation of CoO<sub>x</sub>/BiVO<sub>4</sub> and RhO<sub>x</sub>/TaON photoanodes.

Fig. S9 Time course and photocurrent and product analysis of a tandem cell constructed with NiO/PRu-*PolyPyr*-RuC<sub>2</sub>RuCAT1 and CoO<sub>x</sub>/BiVO<sub>4</sub> irradiated with simulated solar light.

Fig. S10 Time course and photocurrent and product analysis of a tandem cell constructed with NiO/PRu-*PolyPyr*-RuC<sub>2</sub>RuCAT1 and RhO<sub>x</sub>/TaON irradiated with simulated solar light.

Table S1 Estimation of PRuPyr on NiO/PRuPyr.

Table S2 Estimation of RuPS on NiO/PRu-*PolyPyr*-RuC<sub>2</sub>bpy

Table S3 Estimation of RuPS on NiO/PRu-*PolyPyr*-RuC<sub>2</sub>RuCAT1

Table S4 Estimation of RuPS on NiO/PRu-*PolyPyr*-RuC<sub>2</sub>RuCAT2

Table S5 Summary of photoelectrochemical CO<sub>2</sub> reduction under controlled experimental conditions over NiO/PRu-*PolyPyr*-RuC<sub>2</sub>RuCAT1 for 5 h.

## SI – I Synthesis and Characterization of metal complexes

### **(a) Synthesis of 4,4'-bis((1H-pyrrol-1-yl)methyl)-2,2'-bipyridine (Pyrdmb)**

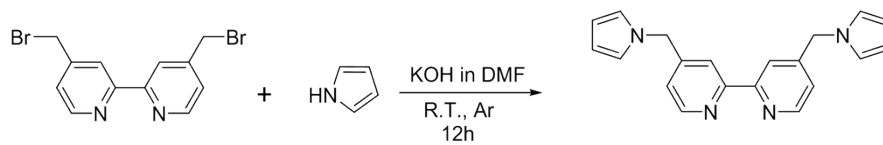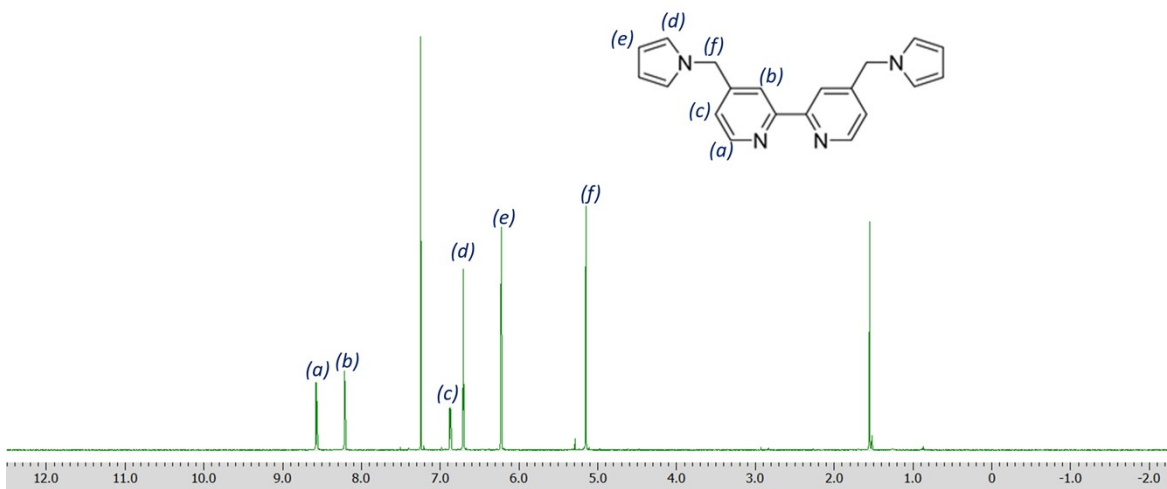

<sup>1</sup>H NMR spectrum of 4,4'-bis((1H-pyrrol-1-yl)methyl)-2,2'-bipyridine in CDCl<sub>3</sub>

**(b) Synthesis of  $[Ru(dmb)_2]Cl_2$**

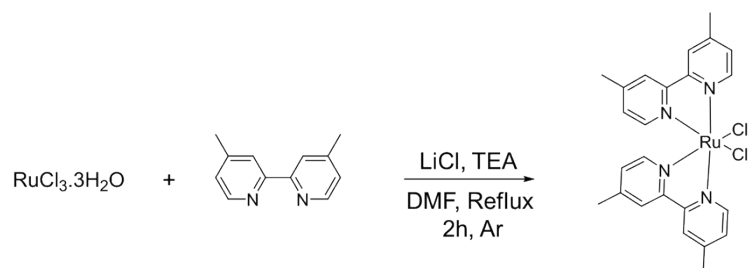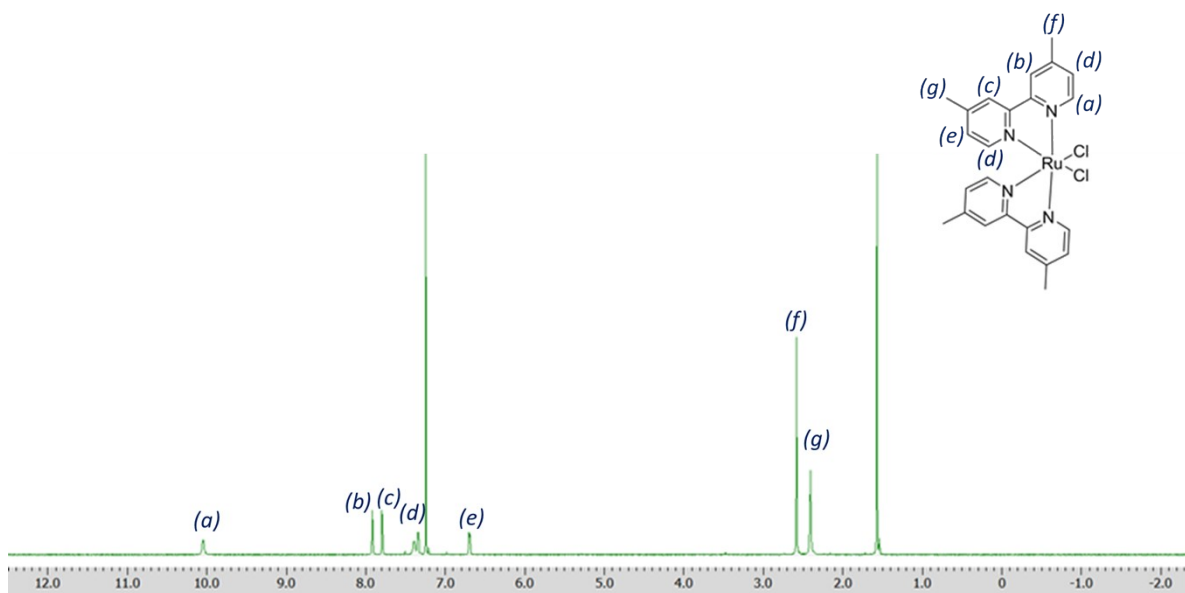

$^1H$  NMR spectrum of  $[Ru(dmb)_2]Cl_2$  in  $CDCl_3$

**(c) Synthesis of  $[Ru(Pyrdmb)_2Cl_2]$**

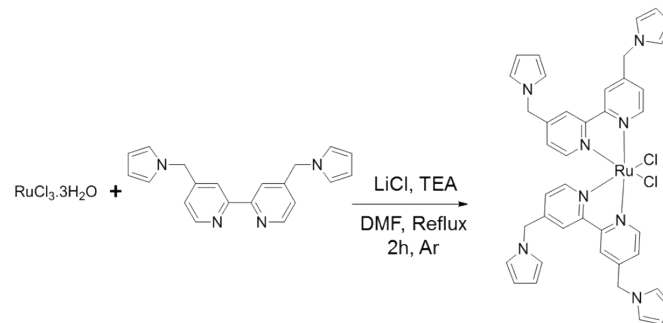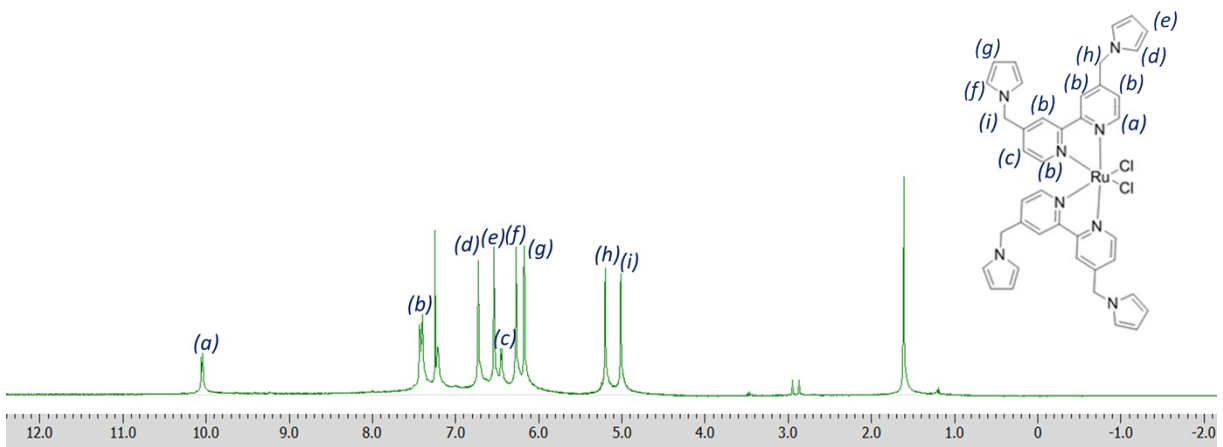

**(d) Synthesis of  $[Ru(dmb)(Pyrdmb)Cl_2]$**

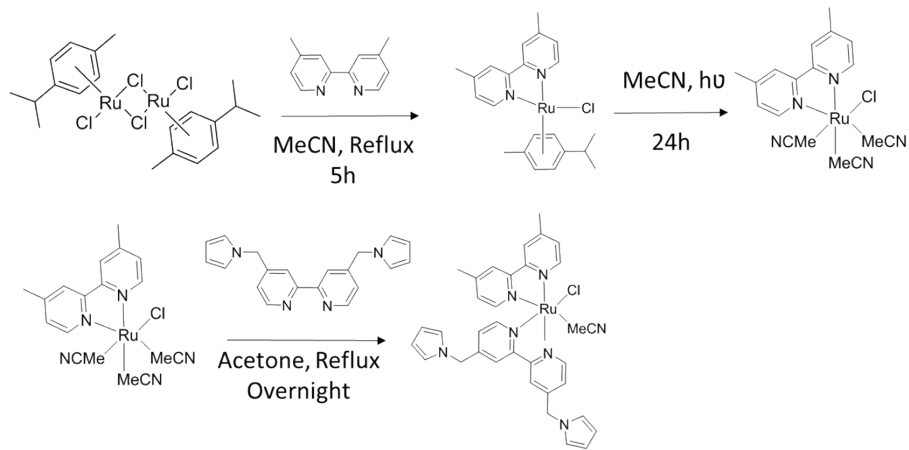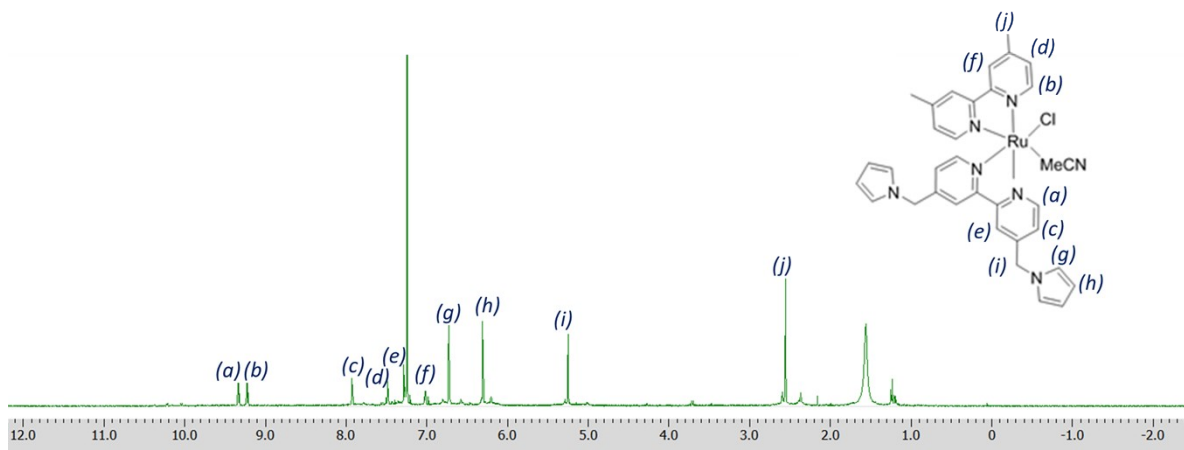

$^1H$  NMR spectrum of  $[Ru(dmb)(Pyrdmb)Cl_2]$  in  $CDCl_3$

**(e) Synthesis of  $[Ru(dmb)_2(Pyrdmb)](PF_6)_2$  (PyrRu)**

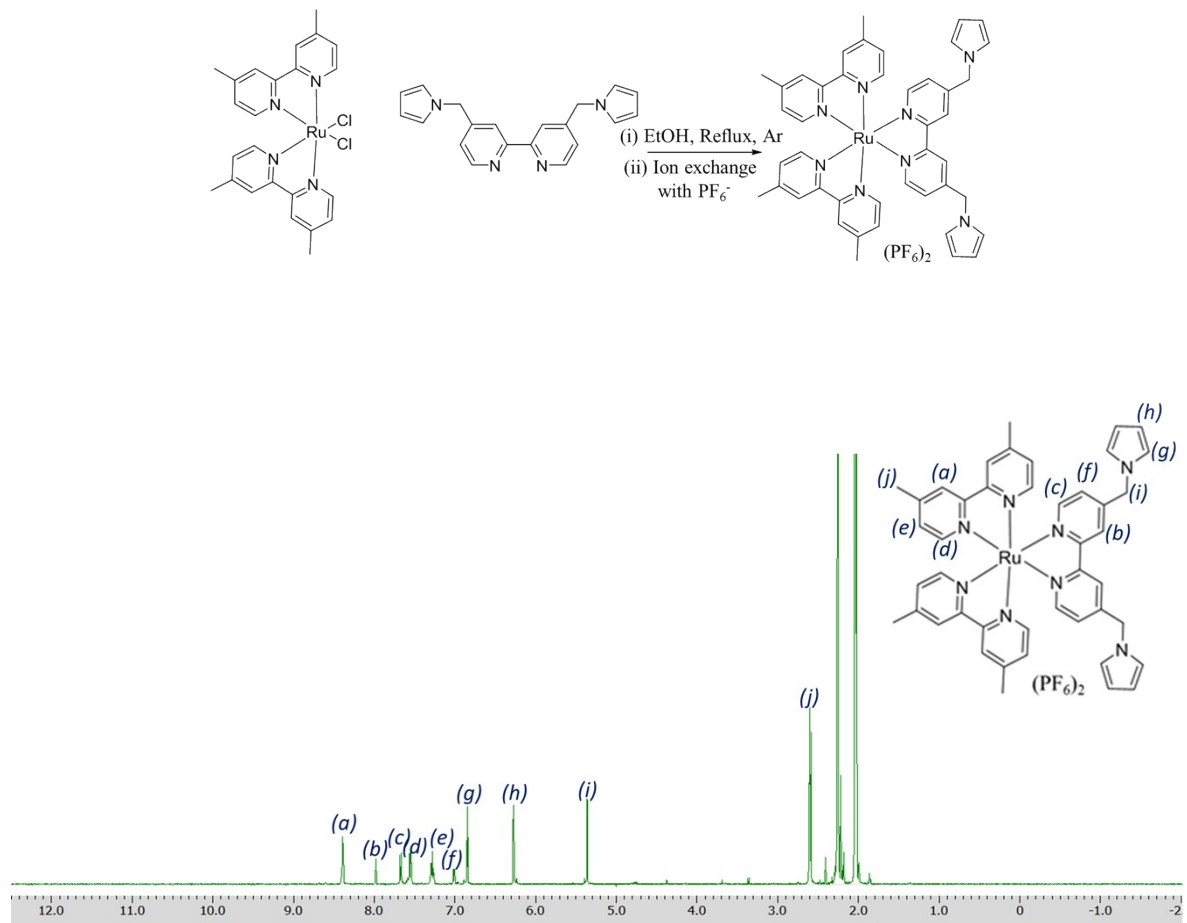

Figure SI-I (5).  $^1H$  NMR spectrum of  $[Ru(dmb)_2(Pyrdmb)](PF_6)_2$  in Acetone- $d_6$

**(f) Synthesis of  $[\text{Ru}(\text{Pyrdmb})_2(\text{dmb})](\text{PF}_6)_2$  (Pyr2Ru)**

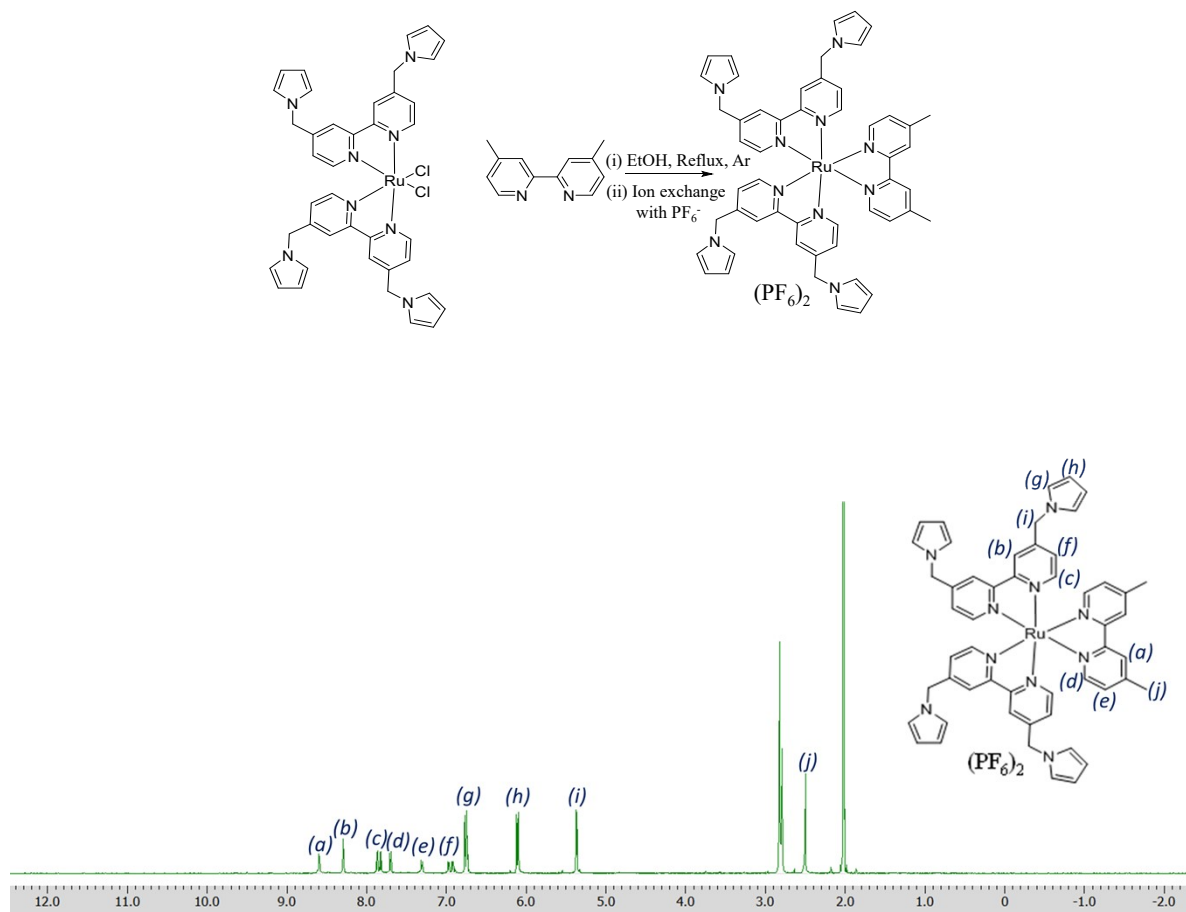

Figure SI-I (6).  $^1\text{H}$  NMR spectrum of  $[\text{Ru}(\text{Pyrdmb})_2(\text{dmb})](\text{PF}_6)_2$  in Acetone- $\text{d}_6$



**(g) Synthesis of  $[Ru(dmb)(Pyrdmb)(dmb-PO_3H_2)](PF_6)_2$  (PRuPyr)**

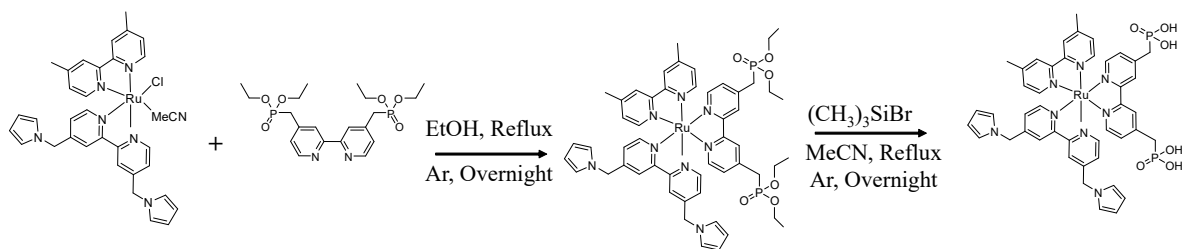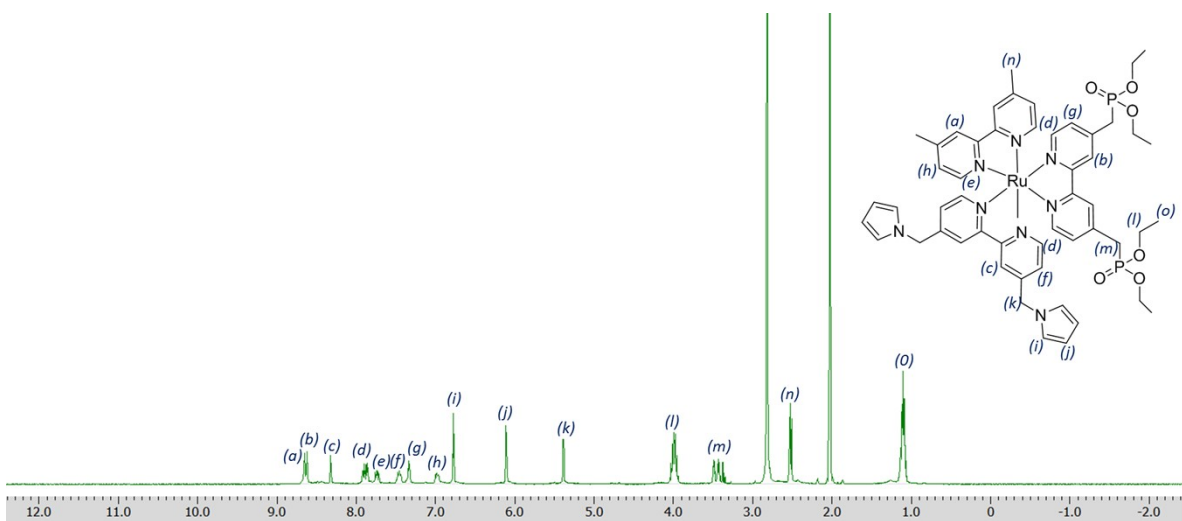

$^1H$  NMR spectrum of  $[Ru(dmb)(Pyrdmb)(dmb-PO_3Et_2)](PF_6)_2$  in  $Acetone-d_6$

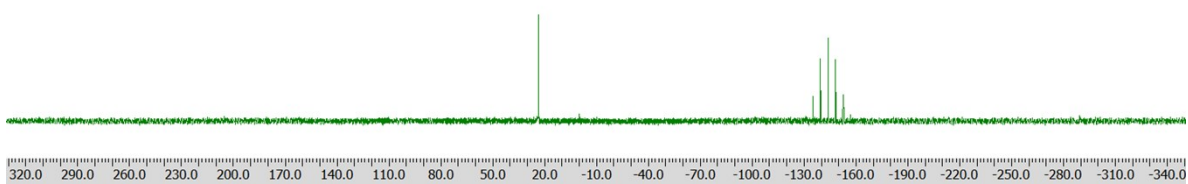

$^{31}P$  NMR spectrum of  $[Ru(dmb)(Pyrdmb)(dmb-PO_3Et_2)](PF_6)_2$  in  $Acetone-d_6$

**(h) Synthesis of  $[Ru(dmb)(Pyrdmb)(bpyC_2bpy)](PF_6)_2$  (PyrRuC<sub>2</sub>bpy)**

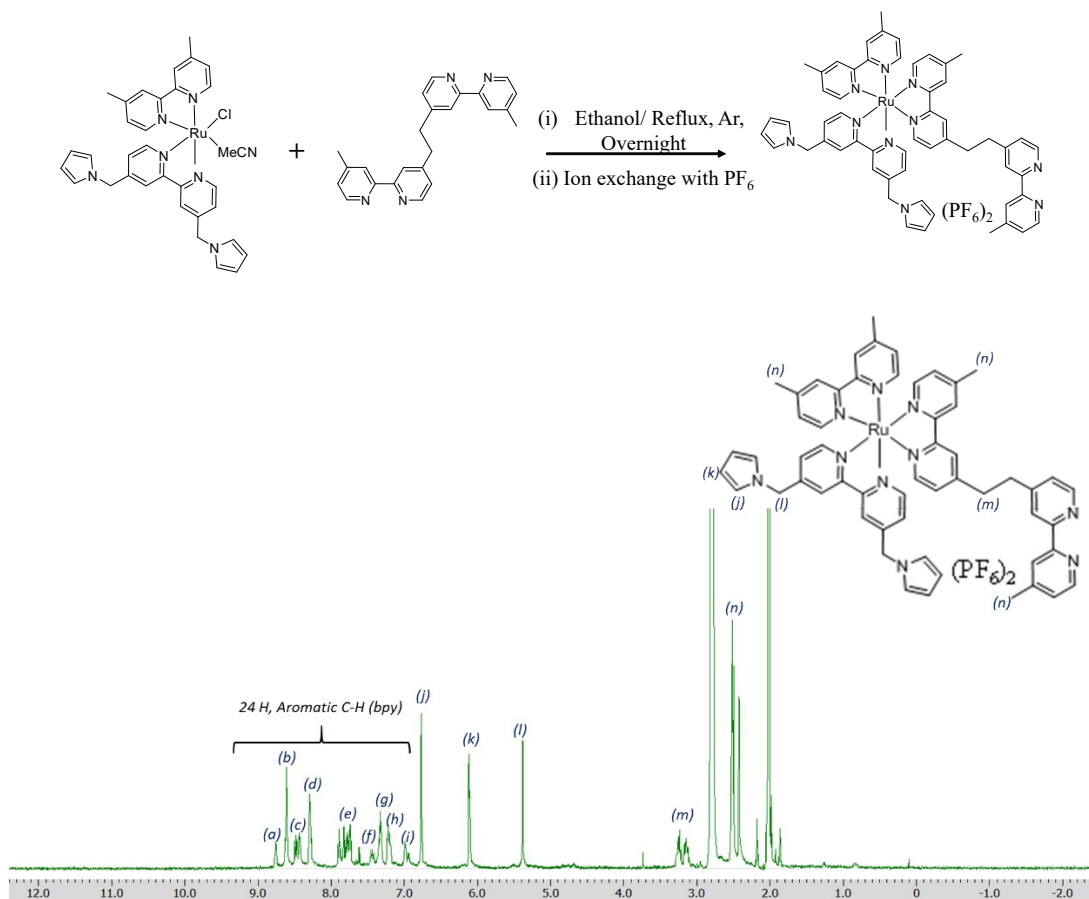

$^1H$  NMR spectrum of  $[Ru(dmb)(Pyrdmb)(bpyC_2bpy)](PF_6)_2$  in  $Acetone-d_6$ .

(i) Synthesis of  $[\text{Ru}(\text{dmb})(\text{Pyrdmb})(\text{bpyC}_2\text{bpy})\text{Ru}(\text{CO})_2\text{Cl}_2](\text{PF}_6)_2$  (PyrRuC<sub>2</sub>RuCAT)

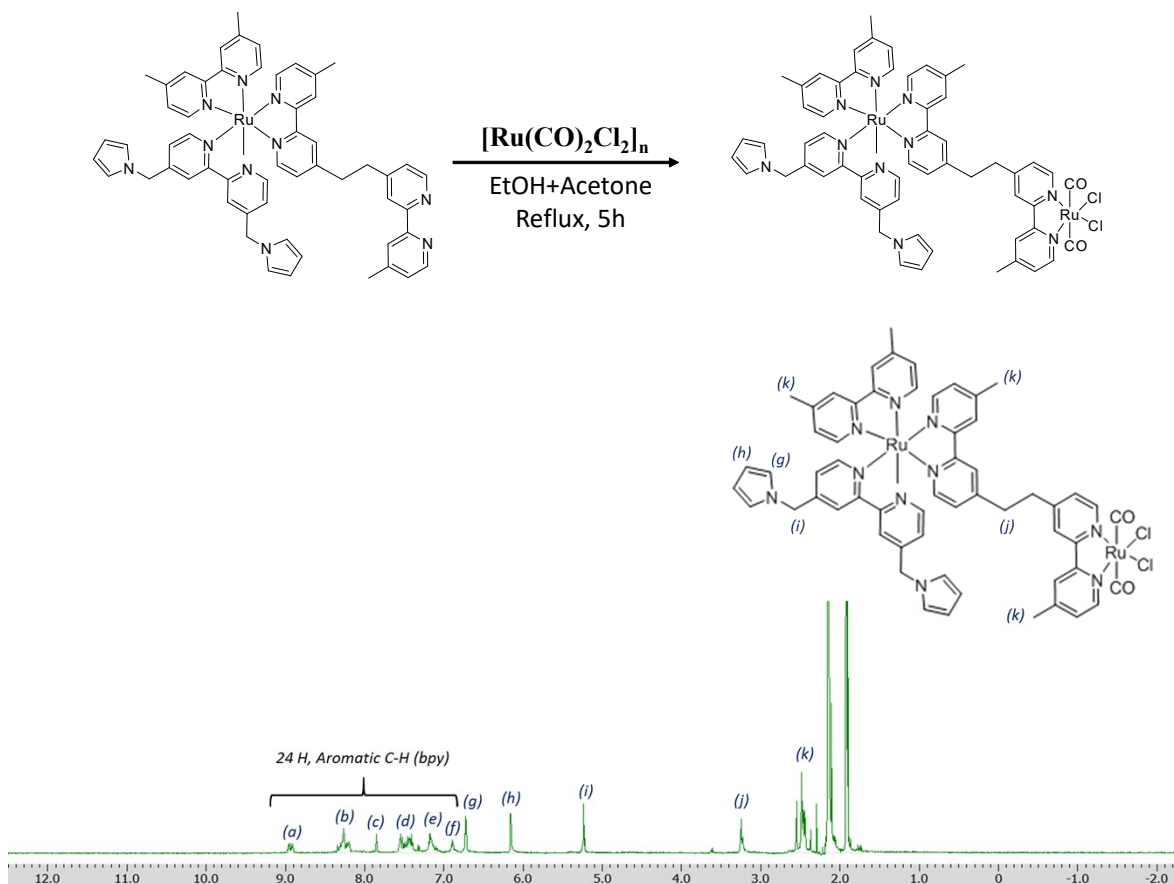

$^1\text{H}$  NMR spectrum of  $[\text{Ru}(\text{dmb})(\text{Pyrdmb})(\text{bpyC}_2\text{bpy})\text{Ru}(\text{CO})_2\text{Cl}_2](\text{PF}_6)_2$  in  $\text{Acetone-d}_6$

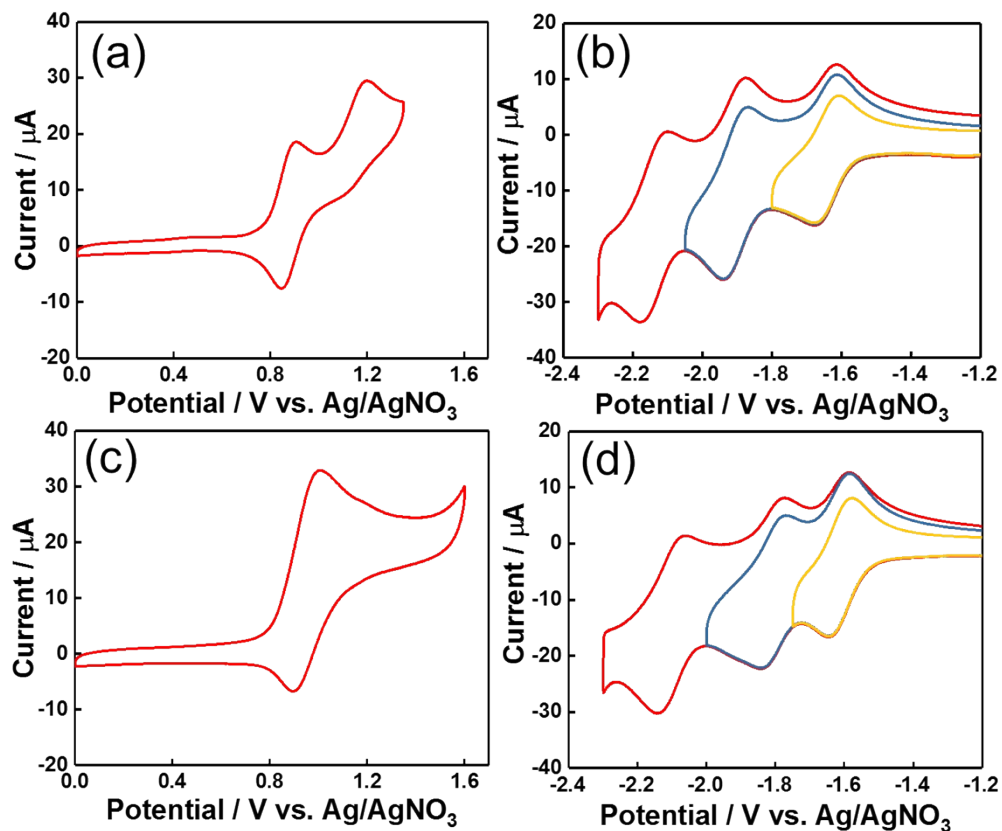

**Fig. S1** Cyclic voltammograms of *PyrRu* (a, b) and *Pyr2Ru* (c, d) recorded at  $200 \text{ mV s}^{-1}$  in MeCN containing the corresponding complex (0.5 mM) and  $\text{Et}_4\text{NBF}_4$  (0.1 M) as the electrolyte under Ar using a ring-shaped glassy carbon working electrode ( $\phi = 0.3 \text{ mm}$ ), a  $\text{Ag}/\text{AgNO}_3$  reference electrode, and a Pt wire counter electrode.

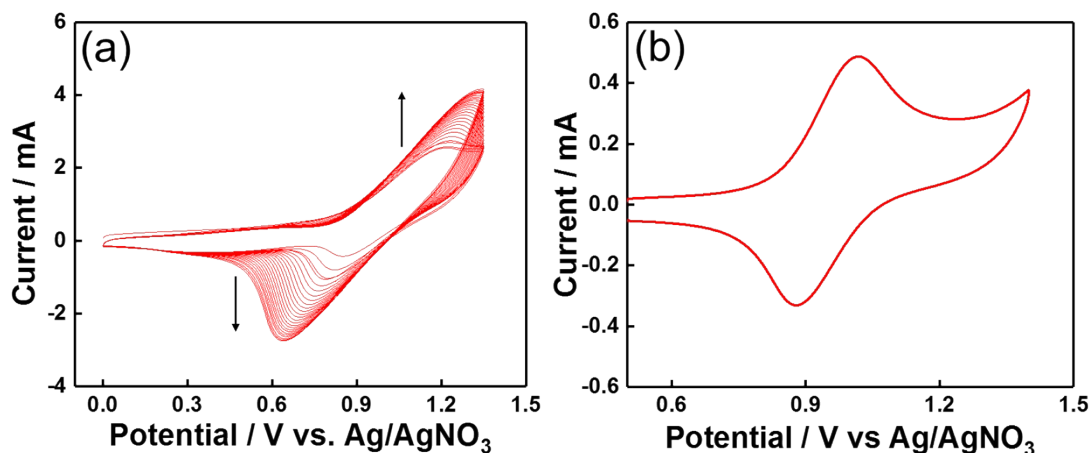

**Fig. S2** (a) Cyclic voltammograms recorded during the oxidative electropolymerization of *Pyr2Ru* on NiO (electrode area = 2.5 cm<sup>2</sup>) in Ar-saturated MeCN containing *Pyr2Ru* (0.5 mM) and Et<sub>4</sub>NBF<sub>4</sub> (0.1 M) as an electrolyte. The potential was cycled 25 times between 0 and +1.35 V (vs. Ag/AgNO<sub>3</sub>) at 100 mV s<sup>-1</sup>. (b) Cyclic voltammogram of the NiO/*PolyPyr2Ru* working electrode recorded in MeCN containing 0.1 M Et<sub>4</sub>NBF<sub>4</sub> as an electrolyte (counter electrode = Pt coil, reference electrode = Ag/AgNO<sub>3</sub>) at 10 mV s<sup>-1</sup>.

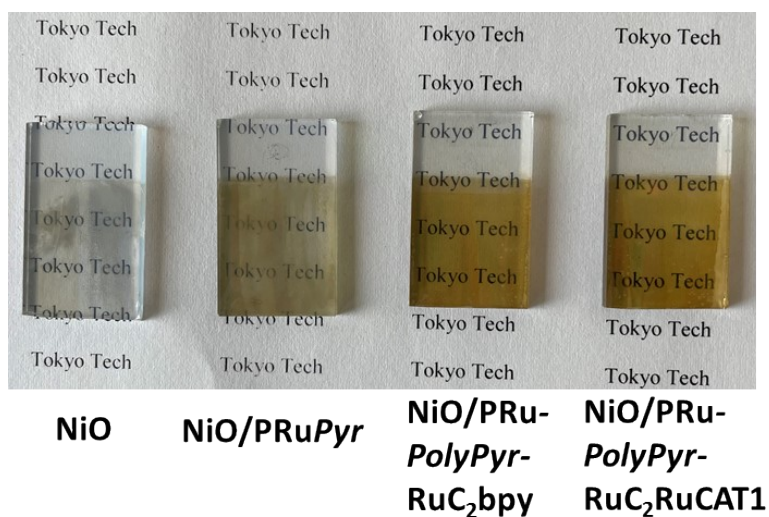

**Fig. S3** Images of photocathode after each steps of fabrication

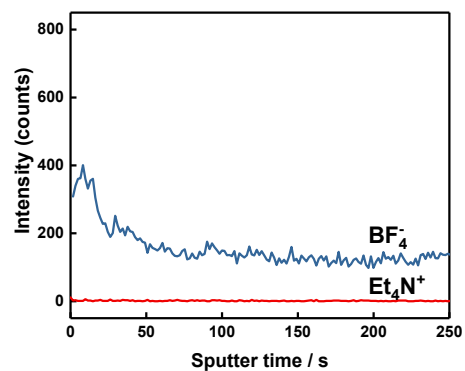

Fig. S4 TOF – SIMS spectra of NiO/PRu-PolyPyr-Ru<sub>2</sub>RuCAT1 for ionic species Et<sub>4</sub>N<sup>+</sup> and BF<sub>4</sub><sup>-</sup>

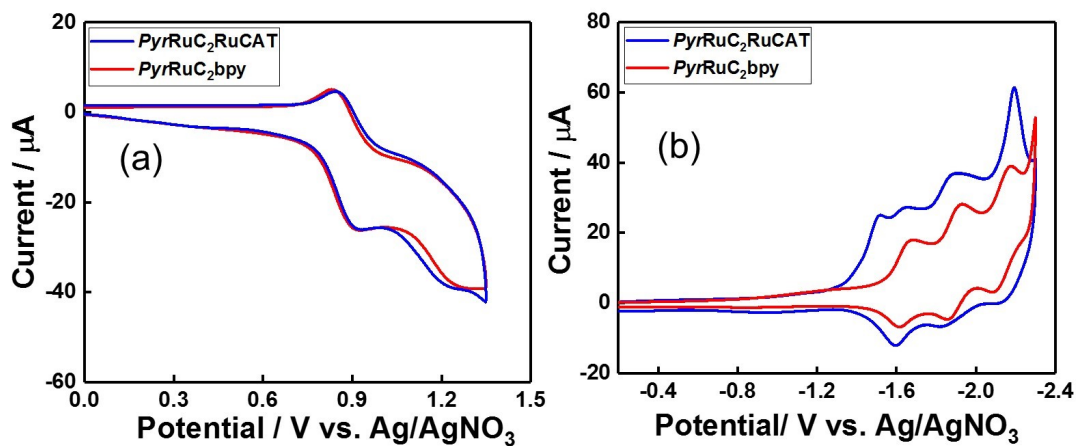

Fig. S5 Cyclic voltammograms of PyrRuC<sub>2</sub>RuCAT and PyrRuC<sub>2</sub>bpy measured in MeCN solutions containing 0.1M Et<sub>4</sub>NBF<sub>4</sub> as an electrolyte under an Ar atmosphere (Scan rate = 200mV s). WE: GC ( $\phi$ = 0.3mm) RE: Ag/AgNO<sub>3</sub> and CE: Pt.

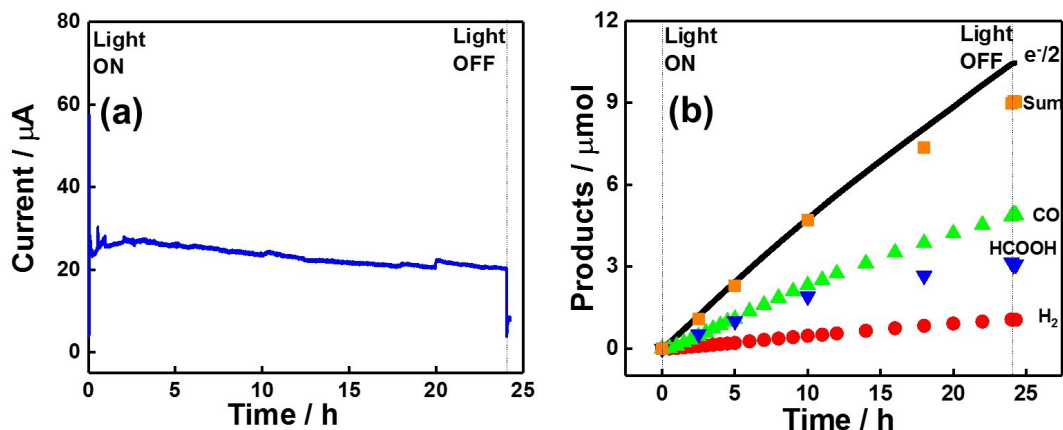

**Fig. S6** (a) Time courses of photocurrent and (b) products expressed as half of electrons passed (black line), CO (green triangle), HCOOH (blue triangle), and H<sub>2</sub> (red circle). NiO/PRu-*PolyPyr*-RuC<sub>2</sub>RuCAT1 (electrode area: 2.5 cm<sup>2</sup>) applied bias at  $E = -0.7$  V vs. Ag/AgCl was irradiated at  $460 \text{ nm} < \lambda_{\text{ex}} < 650 \text{ nm}$  ( $8 \text{ mW cm}^{-2}$ ) in a CO<sub>2</sub>-purged 50 mM NaHCO<sub>3</sub> aqueous solution (pH = 6.6).

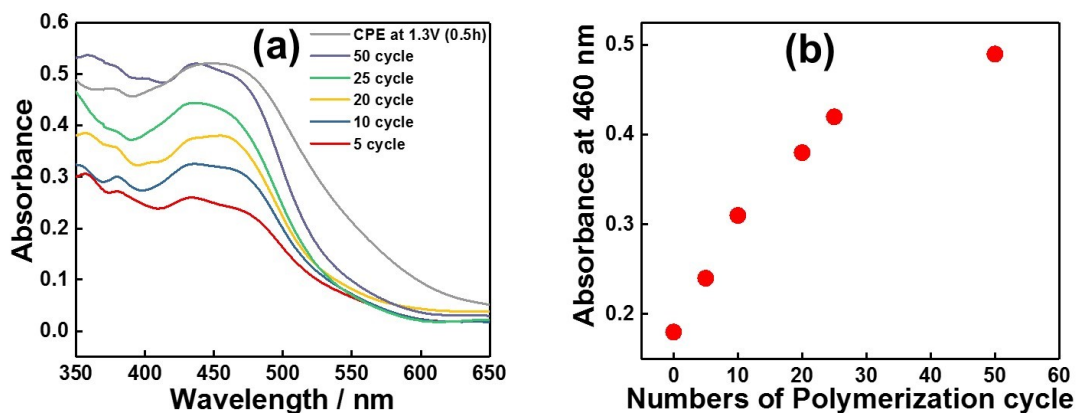

**Fig. S7** (a) UV-Vis (DRS) spectra of NiO/PRu-*PolyPyr*-RuC<sub>2</sub>RuCAT1 prepared under different number of cycles of oxidative CV scan between 0-+1.35V vs. Ag/AgNO<sub>3</sub> (b) Plot between absorbance at  $\lambda=460$  nm versus number of polymerization cycle

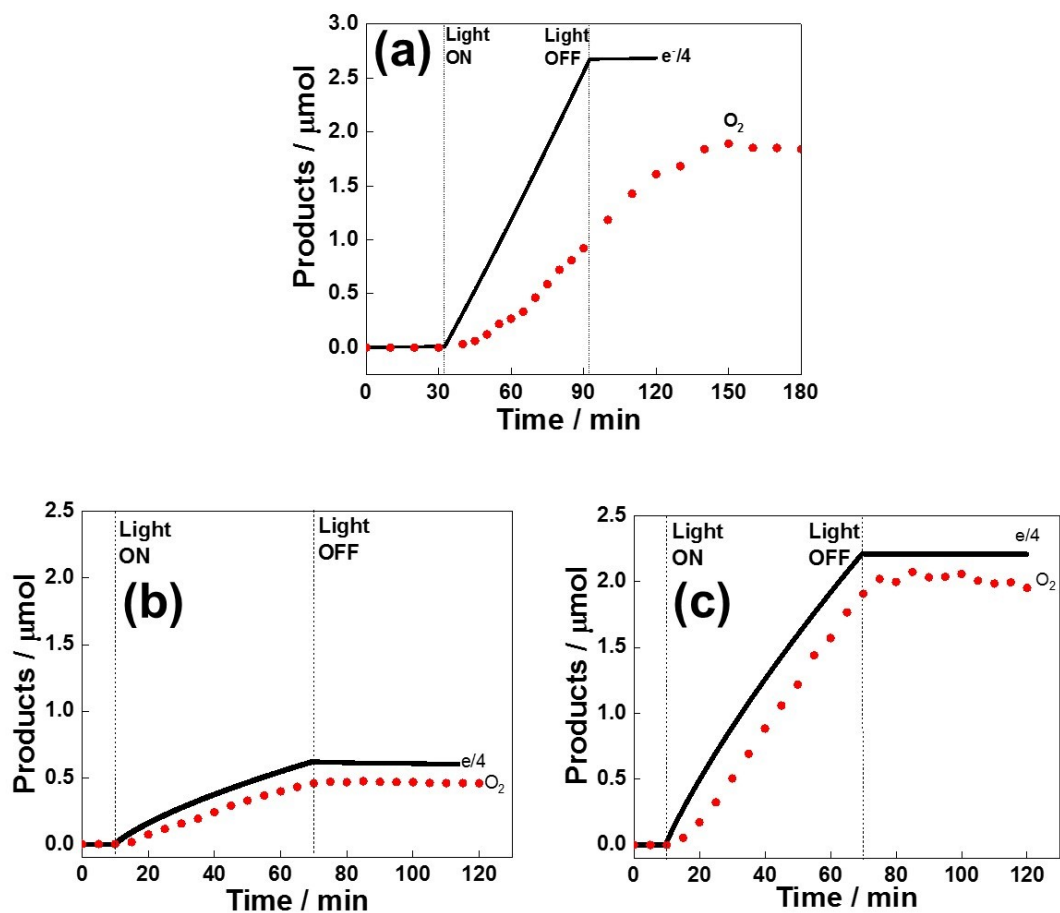

**Fig. S8** Time courses of the electrons and oxygen evolved by irradiating CoO<sub>x</sub>/BiVO<sub>4</sub> or RhO<sub>x</sub>/TaON Photoanode in a three-electrode cell with Nafion® membrane in CO<sub>2</sub> purged 50mM NaHCO<sub>3</sub> solution by using 400 nm <  $\lambda_{\text{ex}}$  < 650 nm (41.2-45.2 mW cm<sup>-2</sup>) (a) CoO<sub>x</sub>/BiVO<sub>4</sub> under applied bias 0.0V vs Ag/AgCl (b) RhO<sub>x</sub>/TaON under applied bias 0.0V vs Ag/AgCl and (c) RhO<sub>x</sub>/TaON under applied bias +0.1V vs Ag/AgCl



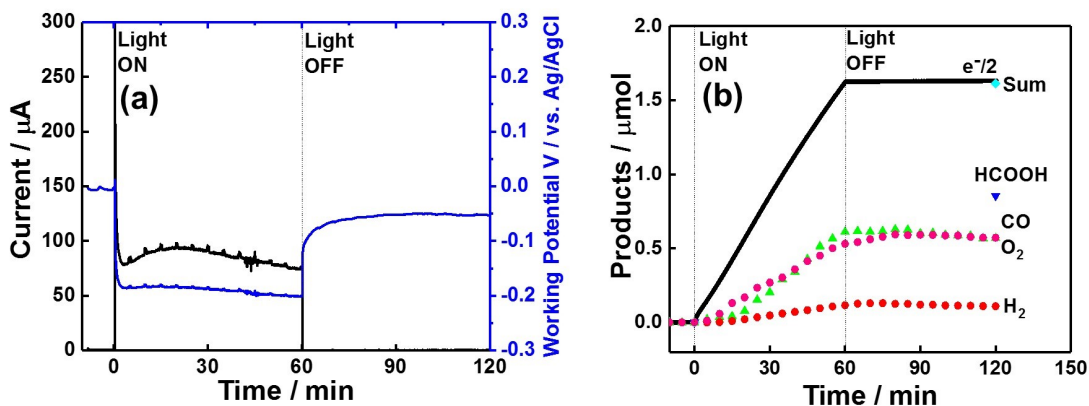

**Fig. S9** Construction of artificial Z-Scheme model under simulated sunlight irradiation (AM 1.5) **(a)** photocurrent (black) and working potential of the electrode (blue line) and **(b)** products under simulated solar light irradiation consisting NiO/PRu-*PolyPyr*-RuC<sub>2</sub>RuCAT1 photocathode and the CoO<sub>x</sub>/BiVO<sub>4</sub> photoanode without any bias in a CO<sub>2</sub>-purged NaHCO<sub>3</sub> (50 mM) aqueous solution (pH = 6.6) in a tandem cell configuration.

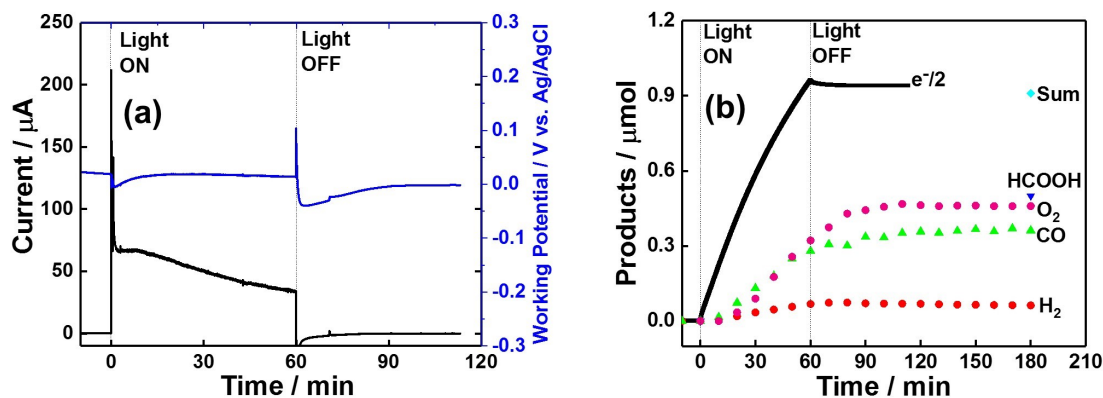

**Fig. S10** Construction of artificial Z-Scheme model under simulated sunlight irradiation (AM 1.5) **(a)** photocurrent (black) and working potential of the electrode (blue line) and **(b)** products under simulated solar light irradiation consisting NiO/PRu-*PolyPyr*-RuC<sub>2</sub>RuCAT1 photocathode and the RhO<sub>x</sub>/TaON photoanode without any bias in a CO<sub>2</sub>-purged NaHCO<sub>3</sub> (50 mM) aqueous solution (pH = 6.6) in a tandem cell configuration.

**Table S1** Estimation of PRuPyr on NiO/PRuPyr by ICP-MS method (Step – 1)

| Sample No | Total amount of PRuPyr<br>$n_{\text{PRuPyr}}$ (nmol) |
|-----------|------------------------------------------------------|
| 1         | 16.7                                                 |
| 2         | 15.9                                                 |
| 3         | 13.0                                                 |
| 4         | 16.5                                                 |

Average amount of PRuPyr adsorbed ( $n_{\text{PRuPyr}}$ ) =  $15.5 \pm 1.3$  nmol

**Table S2** Estimation of total Ru Photosensitizers (RuPS) by ICP-MS analysis of NiO/PRu-PolyPyr-RuC<sub>2</sub>bpy (Step – 2)

| Sample No | Total amount of Ru photosensitizer<br>$n_{\text{RuPS}}$ (nmol) |
|-----------|----------------------------------------------------------------|
| 1         | 76.1                                                           |
| 2         | 73.2                                                           |
| 3         | 77.2                                                           |
| 4         | 75.1                                                           |

Average amount of RuPS adsorbed =  $75.4 \pm 1.3$  nmol

**Table S3** Estimation of total amount of Ru (PS+CAT) by ICP-MS analysis of NiO/PRu-PolyPyr-RuC<sub>2</sub>RuCAT1 (Step – 3)

| Sample No | Total amount<br>Of Ru<br>$n_{\text{Ru(PS+CAT)}}$ (nmol) |
|-----------|---------------------------------------------------------|
| 1         | 109.5                                                   |
| 2         | 103.9                                                   |
| 3         | 92.5                                                    |
| 4         | 95.2                                                    |

Average amount of Ru(PS+CAT) adsorbed =  $100.3 \pm 5.5$  nmol

**Table S4** Estimation of total amount of Ru (PS+CAT) by ICP-MS analysis of NiO/PRu-PolyPyr-Ru<sub>2</sub>CuCAT2 (Two-step method)

| Sample No | Total amount Of Ru<br>$n_{\text{Ru(PS+CAT)}} \text{ (nmol)}$ |
|-----------|--------------------------------------------------------------|
| 1         | 49.2                                                         |
| 2         | 34.6                                                         |
| 3         | 35.5                                                         |
| 4         | 43.4                                                         |

Average amount of Ru(PS+CAT) adsorbed =  $40.7 \pm 5.6$  nmol

**Table S5** Photoelectrochemical reactions using NiO/PRu-PolyPyr-Ru<sub>2</sub>CuCAT1 under varying conditions for 5h.

| Entry | Applied Potential | Light          | Atmosphere      | Electrolyte            | Products / $\mu\text{mol}$ |      |       |                |
|-------|-------------------|----------------|-----------------|------------------------|----------------------------|------|-------|----------------|
|       |                   |                |                 |                        | $e^-/2$                    | CO   | HCOOH | H <sub>2</sub> |
| 1     | O                 | O              | CO <sub>2</sub> | NaHCO <sub>3</sub>     | 4.6                        | 2.9  | 1.1   | 0.3            |
| 2     | O                 | X <sup>a</sup> | CO <sub>2</sub> | NaHCO <sub>3</sub>     | n.d.                       | n.d. | n.d.  | n.d.           |
| 3     | X <sup>b</sup>    | O              | CO <sub>2</sub> | NaHCO <sub>3</sub>     | n.d.                       | n.d. | n.d.  | n.d.           |
| 4     | O                 | O              | Ar              | Phosphate <sup>c</sup> | 06                         | n.d. | n.d.  | 0.1            |

<sup>a</sup> Without irradiation. <sup>b</sup> Without potentiostat. <sup>c</sup> Phosphate buffer: pH 7.4, [Na<sub>2</sub>HPO<sub>4</sub>·7H<sub>2</sub>O] = 75.4 mM + [NaH<sub>2</sub>PO<sub>4</sub>·H<sub>2</sub>O] = 24.6 mM.
